# Supplementary material
Source: PubMed Central journal article supplement (PMC7173726)
Supplement: NIHMS1575318-supplement-Alharbi_CantBe_Suppl.pdf [file NIHMS1575318-supplement-Alharbi_CantBe_Suppl.pdf]

# Social media usage and privacy expectations

Do you participate in social media activities like Facebook, Twitter, Foursquare, have a blog, or other social media activities?

- Yes
- No

If yes, how often do you post information and pictures to those sites

---

Do you have any preferences or expectations for privacy when using social media? If so, what are those concerns?

---

Generally speaking, how do you rate your preferences or expectations for privacy?

- Extremely Private - I prefer to keep information about me to myself
- Somewhat Private - I tend to share my information with a small circle of trusted family and friends
- Neither private or Open
- Somewhat Open - I'm willing to share my information with friends, family, friends of friends, etc.
- Extremely Open - I share my information with anyone

# Post experiment questionnaire

---

---

**Before beginning this section, please notify the researcher.**

**What did you think about wearing the devices below to collect data about your activities**

Camera

Wrist-worn device

Neck-worn device

---

---

---

---

---

**What can we do to improve the experience of wearing the ....**

Camera

Wrist-worn device

Neck-worn device

---

---

---

---

---

**Did you have any concerns about wearing any of the devices (listed below) before you enrolled?**

camera

- Yes  
 No

Can you please describe those concerns?

---

Wrist-worn device

- Yes  
 No

Can you please describe those concerns?

---

Neck-worn device

- Yes  
 No

Can you please describe those concerns?

---

---

---

**Did you ever take or cover any of the devices listed below? (Other than when you went to the bathroom)**

Camera

- Yes  
 No

Why or why not?

---

Wrist-worn device

- Yes  
 No

Why or why not?

---

Neck-worn device

- Yes  
 No

Why or why not?

---

---

---

**Were there any situations when wearing the devices below you felt uncomfortable?**

Camera

- Yes  
 No

Under what circumstance?

Please specify (if possible) how, why and the place.

\_\_\_\_\_

Wrist-worn device

- Yes  
 No

Under what circumstance?

Please specify (if possible) how, why and the place.

\_\_\_\_\_

Neck-worn device

- Yes  
 No

Under what circumstance?

Please specify (if possible) how, why and the place.

\_\_\_\_\_

---

---

**Did anyone ask you about the devices listed below?**

Camera

- Yes  
 No

About how many times were you asked about it?

\_\_\_\_\_

Who asked you? where?

\_\_\_\_\_

What did you tell people that asked about the device?

\_\_\_\_\_

What was their reaction when you told them about the device?

\_\_\_\_\_

Did anyone ask you to take the camera off or turn it off/around?

- Yes  
 No

Under what circumstance?

Please specify (if possible) there reasons, who asked and where did it happen

\_\_\_\_\_

Wrist-worn

- Yes  
 No

About how many times were you asked about it?

\_\_\_\_\_

Who asked you? where?

---

What did you tell people that asked about the device?

---

What was their reaction when you told them about the device?

---

Neck-worn

- Yes
- No

About how many times were you asked about it?

---

Who asked you? where?

---

What did you tell people that asked about the device?

---

What was their reaction when you told them about the device?

---

Did wearing the camera change how you normally go about your daily activities?

- Yes
- No

Did the device change how you ate?

- Yes
- No

How?

---

Did the device change how you socialized?

- Yes
- No

How?

---

Did the device change how you felt in public places?

- Yes
- No

How?

---

Did the device change how you felt at home?

- Yes
- No

How?

---

Anything else? (If any)

---

Did wearing the wrist-worn device change how you normally go about your daily activities?

- Yes
- No

Did the device change how you ate?

- Yes
- No

How?

---

Did the device change how you socialized?

- Yes
- No

How?

---

Did the device change how you felt in public places?

- Yes
- No

How?

---

Did the device change how you felt at home?

- Yes
- No

How?

---

Anything else? (If any)

---

Did wearing the neck-worn device change how you normally go about your daily activities?

- Yes
- No

Did the device change how you ate?

- Yes
- No

How?

---

Did the device change how you socialized?

- Yes
- No

How?

---

Did the device change how you felt in public places?

- Yes
- No

How?

---

Did the device change how you felt at home?

- Yes
- No

How?

---

Anything else? (If any)

---

# Other camera - 2nd

---

---

**Before beginning this section, please notify the researcher.**

What was the second design that you tried?

Wrist  Chest  Shoulder

What did you think about wearing this design of the camera?

---

What can we do to improve the experience of this design of the camera?

---



# Other camera - third

---

---

**Before beginning this section, please notify the researcher.**

What was the third design that you tried?

Wrist    Chest    Shoulder

What did you think about wearing this design of the camera?

---

What can we do to improve the experience of this design of the camera?

---

# Video of camera 1

---

---

**Before beginning this section, please notify the researcher.**

**Now that you've viewed the video of the FIRST design.**

Are they what you expected?

- Yes
- No

If no, why not?

---

How easy was it to label the start and the end of the eating period in this video?

- Very easy
- Easy
- Average
- Difficult
- Very difficult

Why was the labeling of eating period hard or easy in this video?

---

Do you have any further privacy or comfort concerns which might be provoked by the angle of recording of this camera design?

- Yes
- No

If yes, can you please describe those concerns?

---

# Video of camera 2

---

---

**Before beginning this section, please notify the researcher.**

## **Now that you've viewed the video of the SECOND design**

Are they what you expected?

- Yes
- No

If no, why not?

---

How easy was it to label the start and the end of the eating period in this video?

- Very easy
- Easy
- Average
- Difficult
- Very difficult

Why was the labeling of eating period hard or easy in this video?

---

Do you have any further privacy or comfort concerns which might be provoked by the angle of recording of this camera design?

- Yes
- No

If yes, can you please describe those concerns?

---

# Video of camera 3

---

---

**Before beginning this section, please notify the researcher.**

## **Now that you've viewed the video of the THIRD design**

Are they what you expected?

- Yes
- No

If no, why not?

---

How easy was it to label the start and the end of the eating period in this video?

- Very easy
- Easy
- Average
- Difficult
- Very difficult

Why was the labeling of eating period hard or easy in this video?

---

Do you have any further privacy or comfort concerns which might be provoked by the angle of recording of this camera design?

- Yes
- No

If yes, can you please describe those concerns?

---
